# Supplementary material
Source: Springer Nature journal article supplement (https://www.springermedizin.de/resource/supplementary/13049_2011_317_MOESM4_ESM.pdf/9666330)

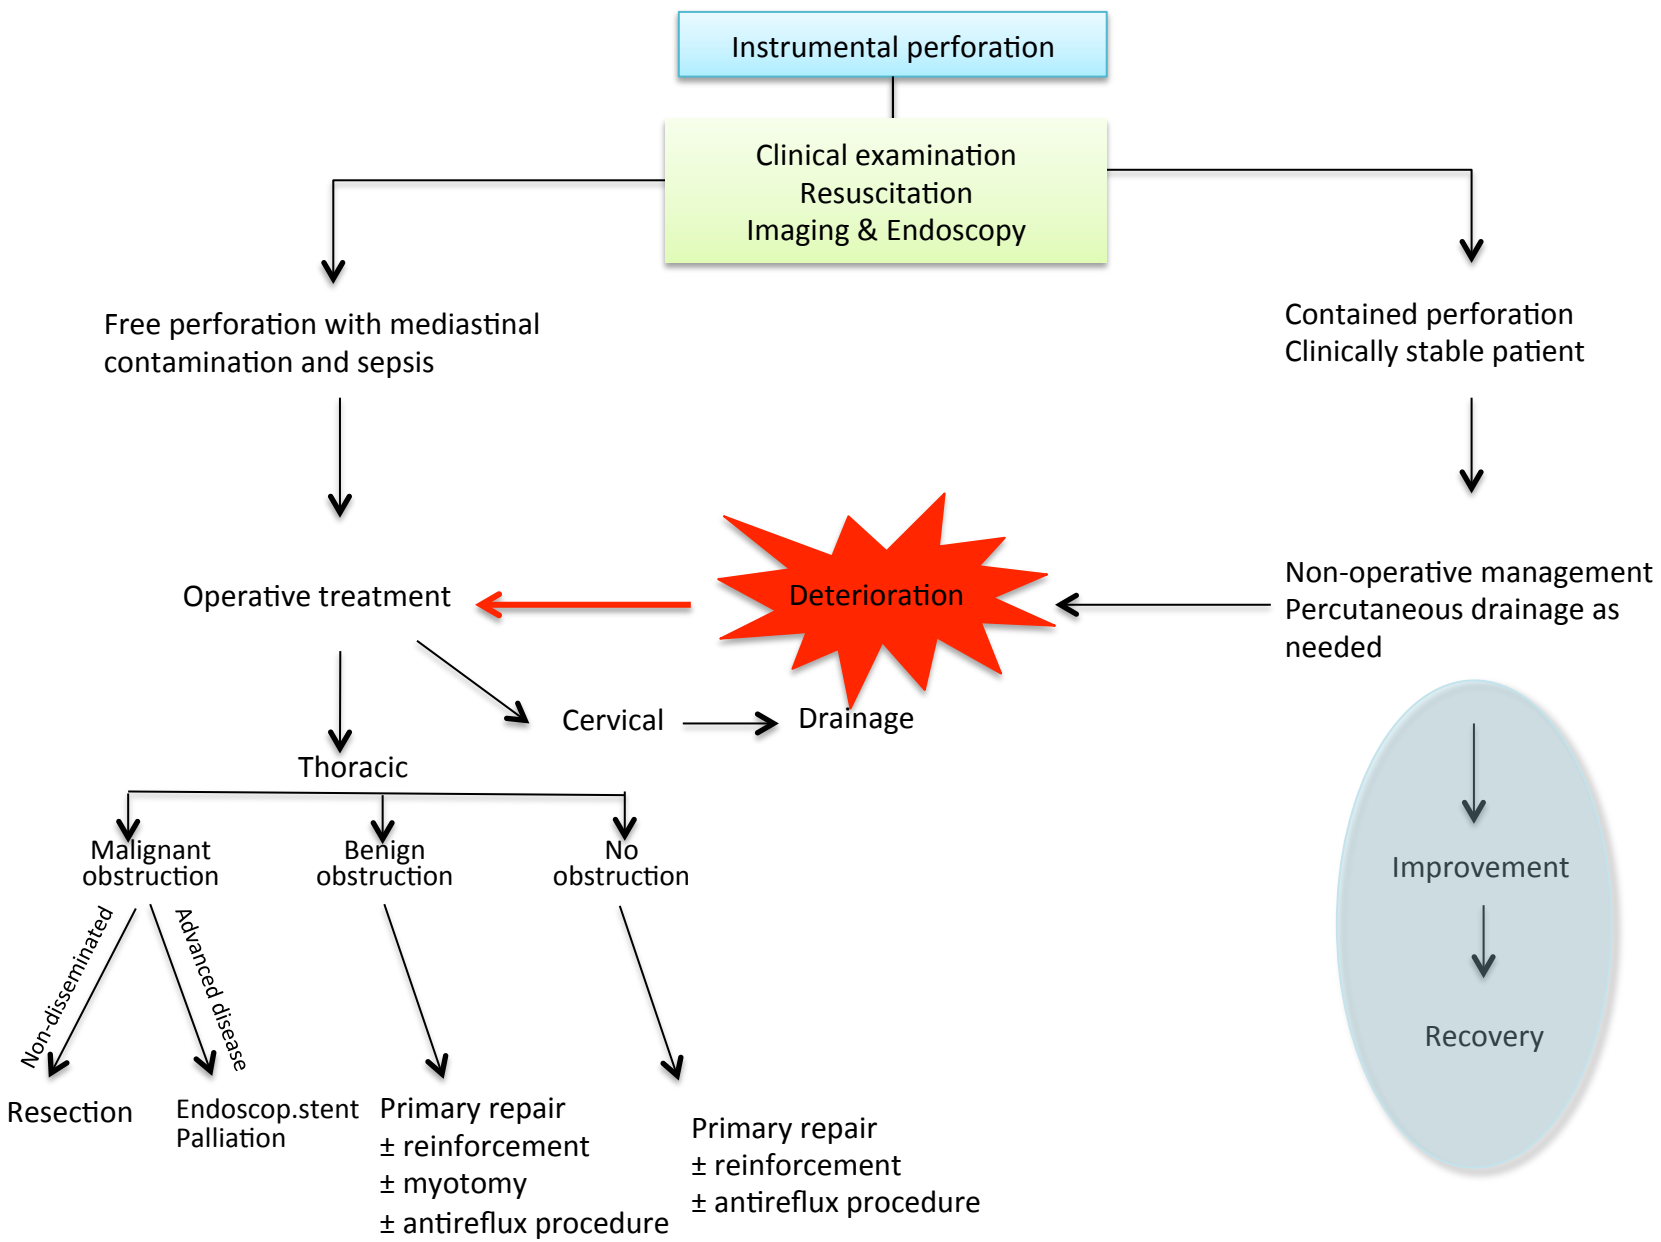

Supplement: MOESM4 [file 9666330]
